# Supplementary material for: Phenomics Research on Coronary Heart Disease Based on Human Phenotype Ontology
Source: Biomed Res Int. 2014 Dec 15;2014:240284. doi: 10.1155/2014/240284 (PMC4279366; doi:10.1155/2014/240284)
Supplement: Supplementary file 1 — We had listed the detailed method for classification in the EXCEL after the comparison between the 107 pieces of TCM four diagnostic method's information with HPO items. There are 4 rows in the EXCEL, the first row is the Chinese Names for the “Four Diagnostic Method's Information”, the second row is the corresponding English Names for the "Four Diagnostic Method's Information", the third row is "Father Node" (the items in second row are under the third items), and the fourth row is the corresponding printscreen from HPO (http://www.human-phenotype-ontology.org/index.php/hpo_home.html), which with shading are the "Father Node". And there are 6 kinds of classified methods, which have been showed in the main content. [file 240284.f1.xlsx]

## Sheet: Sheet1
TCM Representation	English Items	Father Node	Figures of Father Node
胸痛	chest pain	angina pectoris
胸闷	chest distress
气短	short breath
心悸	palpitations	Original Items
咳嗽	cough	pneumonia
白痰	white phlegm
黄痰	yellow phlegm
痰中带血	bloody phlegm
泡沫痰	frothy phlegm
畏寒肢冷	intolerance of cold and cold limb	abnormality of temperature regulation
五心烦热	burning sensation of five centres
倦怠乏力	hypodynamia	weakness
语声低微	faint low voice
腰膝酸软	sore waist and knee	Child node （abnormality of the waist）was built under "phenotypic abnormality", and "soreness and weakness of waist and knees" at next level
自汗	spontaneous perspiration	Child node （abnormality of the perspiration）was built under "abnormality of fluid regulation", and "spontaneous perspiration"&"night sweat" at next level
盗汗	night sweat
下肢水肿	edema of lower extremity	Child node （edema of lower extremity）was built under "edema", and "heavy limbs" at next level
肢体沉重	heavy limbs
五更泄泻	Predawn Diarrhea	Child node （abnormality of the stool）was built under "abnormality of metabolism/homeostasis", and four new nodes at next level
排便无力	asthenia defecation
便溏	loose stool
便秘	constipation
小便短黄	yellow urine and oliguria	abnormality of urine homeostasis
小便清长	clear urine in large amounts
余沥不尽	residual urine
夜尿频多	frequency of micturition at night
头晕	dizziness	cerebral ischemia
头昏	fainting feeling
健忘	amnesia
脘腹发冷	cold sensation in abdomen	abnormality of the abdomen
少腹部压痛	lower abdominal tenderness	abdominal pain
腹胀	abdominal distension	Original Items
脘痞	epigastric fullness	abdominal distention
嗳气	belching	abnormality of the stomach
食欲不振	anorexia
恶心呕吐	nausea and vomiting
失眠	insomnia	abnormality of the nervous system
急噪易怒	irritable tantrum	aggressive behavior
胁胀	hypochondrium distending pain	Child node （abnormality of the hypochondrium）was built under "phenotypic abnormality", and "rib-side distention" at next level
太息	sighing	depression
抑郁	depression	Original Items
耳鸣	tinnitus	Original Items
肢体麻木	limb numbness	stroke
足跟痛	heel pain
肢体偏瘫	paralytic limbs
皮下瘀血	petechiae	Original Items
皮肤粗糙	pachylosis	ecchymoses
咽部异物感	pharynx foreign body sensation	abnormality of the pharynx
口渴不多饮	thirst with no polydipsia	xerostomia
口干	dry mouth
口淡	tastelessness in the mouth	abnormality of taste sensation
口苦	bitter taste in the mouth
口甜	sweet taste in the mouth
口咸	salty taste in the mouth
口粘腻	viscous and greasy taste in the mouth
面部烘热感	facial heating
面色苍白	pale complexion	Child node （abnormality of the complexion）was built under "Abnormality of the face", and five new nodes for complexion at next level
面色恍白	bright pale complexion
面色黯黑	darkish complexion
面色萎黄	sallow complexion
面红	red complexion
目赤/眼睛发红	conjunctival congestion	abnormality of the ocular region
两目干涩/眼干	eyestrain
眼周色黯	dark color around eyes
眼睑浮肿/水肿	edema of the eyelids	palpebral edema
齿龈暗红	dark red lip gingiva	abnormality of the gingiva
口唇色淡	pale lips	lip abnormality
腭黏膜黯	dark color in palatal mucosa	abnormality of the palate
形体肥胖	obesity	increased adipose tissue
形体消瘦	emaciation	decreased subcutaneous fat
舌淡白	pale tongue	Child node （abnormality of the tongue colour）was built under "Abnormality of the tongue", and five new nodes for tongue clour at next level
舌红	red tongue
舌绛红	crimson tongue
舌暗红	dark red tongue
舌紫暗	dark purple tongue
舌体胖大	swollen tongue body	Child node （abnormality of the tongue shape）was built under "Abnormality of the tongue", and three new nodes for tongue shapes at next level
舌体瘦小	thin tongue body
齿痕舌	tooth-marked tongue
厚苔	thick tongue coating	Child node （abnormality of the tongue coating）was built under "Abnormality of the tongue", and ten new nodes for tongue feel at next level
腻苔	greasy tongue coating
腐苔	curdy tongue coating
少苔	few tongue coating
花剥苔	exfoliative tongue coating
无苔	absence of tongue coating
厚腻苔	thick and greasy tongue coating
苔滑	smooth tongue coating
苔色黄	yellow tongue coating
苔色黑	black tongue coating
舌面瘀斑瘀点	glossal petechia	Child node （The lingual ecchymosis petechiae）was built under "Abnormality of the tongue"
络脉淡紫	lavender subglossal collateral vessels	Child node （abnormality of the subglossal collateral vessels）was built under "Abnormality of the tongue", and seven new nodes for clour and thickness of subglossal collateral vessels at next level
络脉青紫	blue purple subglossal collateral vessels
络脉紫黑	black purple subglossal collateral vessels
络脉紫红	mauve subglossal collateral vessels
络脉淡红	pale red subglossal collateral vessels
络脉怒张	subglossal collateral vessels engorgement
络脉细小	fine subglossal collateral vessels
沉脉	deep pulse	Child node （abnormality of the radialis pulse）was built under "abnormality of the vasculature", and eleven new nodes for pulse condition at next level
数脉	rapid pulse
缓脉	moderate pulse
结代	Knotted and Intermittent Pulse
迟脉	slow pulse
细脉	thready pulse
弦脉	Wiry Pulse
紧脉	tense pulse
涩脉	uneven pulse
滑脉	slippery pulse
弱脉	weak pulse
